# Supplementary material for: Interspecific Potato Somatic Hybrids Between Solanum Malmeanum and S. Tuberosum Provide Valuable Resources for Freezing-Tolerance Breeding
Source: Research Square preprint supplement (doi:10.21203/rs.3.rs-307076/v1), 2021-03-13
Supplement: Supplementary file 1 [file 4a864cc00fad6dbc506401f9.xlsx]

## Sheet: Sheet1
Supplement Table S2 Analysis of backcross efficiency of somatic hybrids and cultivated species
Cross	Female	Male	Pollinating flowers	Berry	Berry rate (%)	Seeds	Seeds/berry	Emergence rate(%)
FT069	M+A17-1	Redsen	4	2	50	86	43	38.37
FT070	M+A17-1	Adirondack	8	3	37.5	37	12.33	59.46
FT071	M+A2-1	393160-4	12	3	25	55	18.33	43.64
FT076	03H95-5	M+A59-1	43	15	34.88	448	29.87	66
FT077	10CH36-1	M+A59-1	7	2	28.57	27	13.5	3.7
FT078	Stivling	M+A17-1	6	1	16.67	1	1	0
FT079	Hua 12	M+A59-1	7	4	57.14	85	21.25	67.5
FT080	M+A17-1	11EM47-40	2	1	50	4	4	0
FT081	M+A17-1	AC Red Island	3	2	66.67	3	1.5	33.33
FT082	M+A17-1	Adirondack	9	4	44.44	31	7.75	16.13
FT083	M+A17-1	Congo	4	4	100	61	15.25	0
FT084	M+A17-1	Huashu 11	3	1	33.33	9	9	77.78
FT085	M+A17-1	Huacai 1	2	1	50	4	4	75
FT086	M+A18-1	08CA9512-05	3	3	100	44	14.67	54.55
FT087	M+A18-1	08CA9635-19	9	5	55.56	41	8.2	19.51
FT088	M+A18-1	08HE042-2	24	8	33.33	44	5.5	54.55
FT089	M+A18-1	AC Red Island	13	3	23.08	27	9	14.81
FT090	M+A18-1	F04023	14	3	21.43	19	6.33	21.05
FT091	M+A18-1	River John Blue	17	5	29.41	66	13.2	35
FT092	M+A18-1	Huashu 10	7	2	28.57	12	6	41.67
FT093	M+A18-1	Huashu 11	11	6	54.55	160	26.67	0
FT094	M+A18-1	Huashu 11	13	5	38.46	177	35.4	0
FT095	M+A18-1	Huacai 1	7	2	28.57	69	34.5	32.5
FT097	M+A28-1	Huashu 11	9	2	22.22	12	6	50
FT098	M+A28-1	Huashu 13	2	2	100	8	4	62.5
FT099	M+A28-1	Zhengshu 6	7	3	42.86	25	8.33	20
FT100	M+A45-1	Huashu 11	5	1	20	22	22	54.55
FT101	M+A59-1	08CA9635-19	10	5	50	17	3.4	5.88
FT102	M+A59-1	09HE039-1	9	2	22.22	5	2.5	40
FT103	M+A59-1	10FM33-8E	11	3	27.27	12	4	66.67
FT104	M+A59-1	11FM47-40	6	5	83.33	13	2.6	0
FT105	M+A59-1	12FM29-1	2	1	50	3	3	33.33
FT106	M+A59-1	AC Red Island	8	6	75	41	6.83	26.83
FT107	M+A59-1	Congo	7	2	28.57	29	14.5	27.59
FT108	M+A59-1	F04023	5	1	20	3	3	66.67
FT109	M+A59-1	F04023	5	1	20	3	3	0
FT110	M+A59-1	River John Blue	6	2	33.33	14	7	35.71
FT111	M+A59-1	Huashu 1	5	2	40	5	2.5	100
FT112	M+A59-1	Huacai 1	17	11	64.71	70	6.36	25
FT113	M+A70-1	08CA9635-19	6	2	33.33	60	30	35
FT114	M+A70-1	AC Red Island	4	3	75	43	14.33	13.95
FT115	M+A70-1	F01002	3	2	66.67	16	8	25
FT116	M+A70-1	River John Blue	1	1	100	91	91	87.5
FT117	M+A70-1	Huacai 1	3	2	66.67	127	63.5	56
FT118	M+A74-1	Amsel	2	2	100	10	5	10
FT119	M+A76-1	Congo	7	4	57.14	36	9	16.67
